# Supplementary material for: The Toxoplasma gondii Active Serine Hydrolase 4 Regulates Parasite Division and Intravacuolar Parasite Architecture
Source: PubMed Central journal article supplement (PMC6147133; doi:10.1128/msphere.00393-18), 2018-09-19
Supplement: sph005182644sf3.pdf [file sph005182644sf3.pdf]

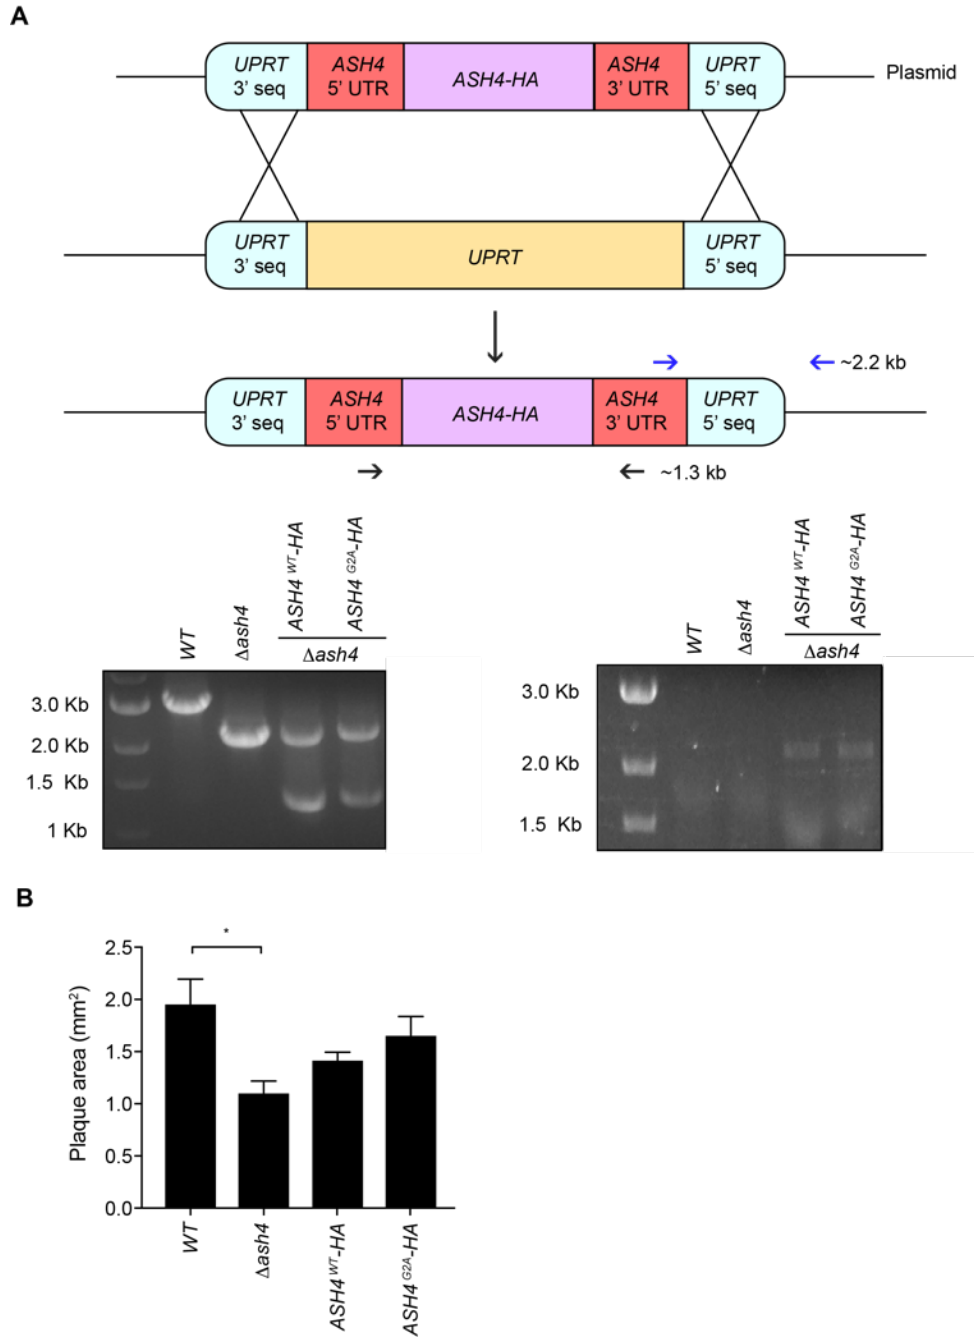

**Supplemental Figure 3:** Generation of  $ASH4^{WT-HA}$  and  $ASH4^{G2A-HA}$  rescue strains. **A)** Cartoon illustrating how the  $ASH4-HA$  alleles were introduced into the UPRT locus using strategy described in Supplemental Figure 2. Left gel shows PCR using primers to demonstrate integration of  $ASH4-HA$  rescue construct. Right gel shows PCR with primers for confirming construct integration into the UPRT locus. **B)** Graph depicts average plaque size of wild type (WT),  $\Delta ash4$ ,  $ASH4^{WT-HA}$  and  $ASH4^{G2A-HA}$  parasites in mm<sup>2</sup> +/- SEM. Experiment was performed 3 independent times in technical triplicate. One way ANOVA was performed followed by Tukey's multiple comparison test to determine statistical significance, all statistically significant comparisons indicated, \* indicates p value < 0.05.
