# Supplementary material for: The Toxoplasma gondii Active Serine Hydrolase 4 Regulates Parasite Division and Intravacuolar Parasite Architecture
Source: PubMed Central journal article supplement (PMC6147133; doi:10.1128/msphere.00393-18), 2018-09-19
Supplement: sph005182644sf4.pdf [file sph005182644sf4.pdf]

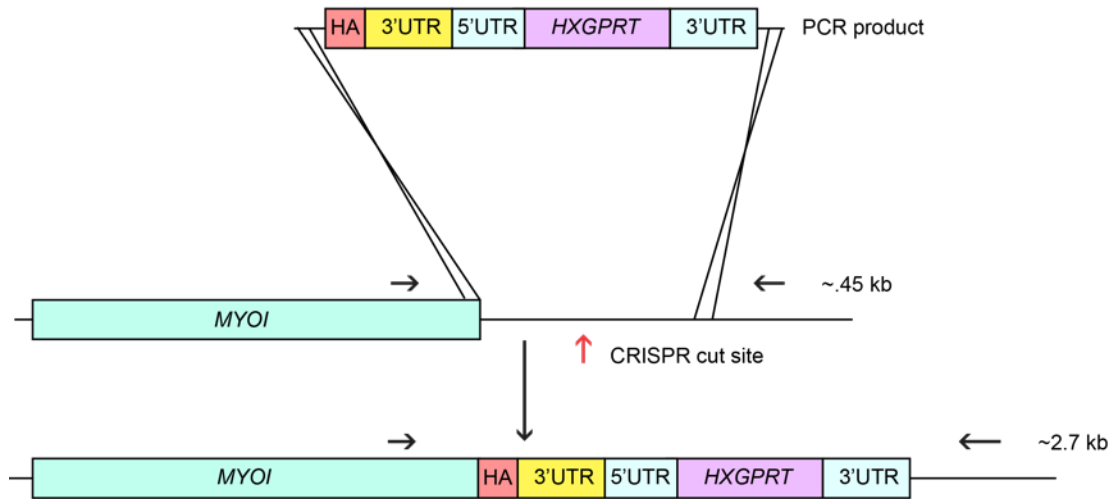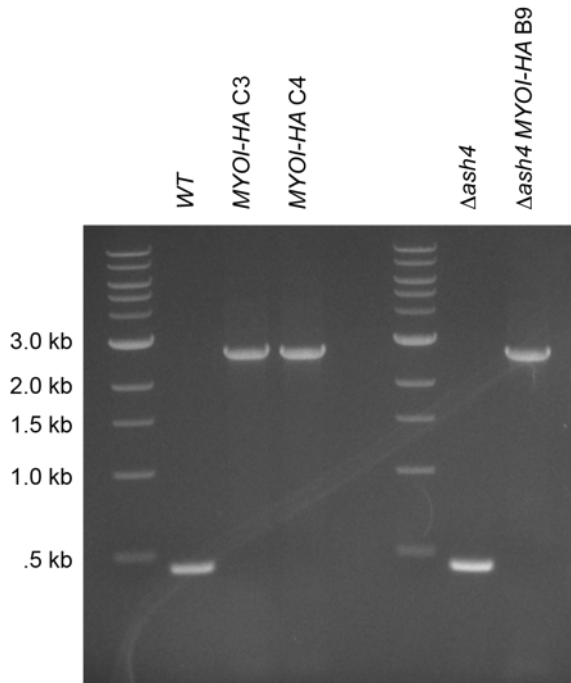

**Supplemental Figure 4:** Generation of *MYOI-HA*, and  $\Delta$ *ash4 MYOI-HA* parasites. Cartoon depicting tagging strategy. Red arrow indicates approximate location of the CRISPR/Cas9 cut site. Black arrows indicate location of *MYOI-HA* check primers. PCR on the untagged endogenous locus results in a 0.45kb band, successful integration of tagging construct results in a band of approximately 2.7kb. PCR shown using *MYO-HA* check primers in wild type (*WT*),  $\Delta$ *ash4*, *MYOI-HA* and  $\Delta$ *ash4 MYOI-HA* strains.
